# Supplementary material for: Developing scandium and yttrium coordination chemistry to advance theranostic radiopharmaceuticals
Source: PubMed Central journal article supplement (PMC9814396; doi:10.1038/s42004-020-0307-0), 2020-05-15
Supplement: 42004_2020_307_MOESM2_ESM.pdf [file 42004_2020_307_MOESM2_ESM.pdf]

## **Description of Additional Supplementary Files**

File Name: Supplementary Data 1

Description: crystallographic information file for complex 1

File Name: Supplementary Data 2

Description: crystallographic information file for complex 2
