# Supplementary material for: Developing scandium and yttrium coordination chemistry to advance theranostic radiopharmaceuticals
Source: PubMed Central journal article supplement (PMC9814396; doi:10.1038/s42004-020-0307-0), 2020-05-15
Supplement: 42004_2020_307_MOESM6_ESM.pdf [file 42004_2020_307_MOESM6_ESM.pdf]

The full content of this file cannot be displayed with your current PDF viewer. Please update to the latest possible version to view this document.
